# Supplementary material for: Analysis of Mutational Status of IGHV, and Cytokine Polymorphisms as Prognostic Factors in Chronic Lymphocytic Leukemia: The Romanian Experience
Source: MDPI journal article supplement (doi:10.3390/ijms25031799), 2024-02-01
Supplement: s1 [file s1]

**Supplementary Materials, Table S1.** Clinical characteristics of CLL patients based on association of SHM with CNVs and/or somatic mutations, and variant alleles of the four studied SNPs

| Variable                            | Mutated IGHV (%) | Unmutated IGHV (%) | p value     | Unmutated IGHV with CNVs (%) | p value          | Unmutated IGHV with somatic | p value | Unmutated IGHV with somatic | p value | IL-10 rs1800896 (%) | p value      | IL-10 rs1800872 (%) | p value      | TNF- $\alpha$ rs361525 (%) | p value | TNF- $\alpha$ rs1800750 (%) | p value    |
|-------------------------------------|------------------|--------------------|-------------|------------------------------|------------------|-----------------------------|---------|-----------------------------|---------|---------------------|--------------|---------------------|--------------|----------------------------|---------|-----------------------------|------------|
|                                     |                  |                    |             |                              |                  |                             |         |                             |         | TT                  | TC+CC        | GG                  | GT+TT        | GG                         | GA      | GG                          | GA         |
| <b>Age, y</b>                       |                  |                    |             |                              |                  |                             |         |                             |         |                     |              |                     |              |                            |         |                             |            |
| <40                                 | 1<br>(0.8)       | 1<br>(0.8)         | 0.93        | 0<br>(0.0)                   | 0.52             | 0<br>(0.0)                  | 0.65    | 0<br>(0.0)                  | 0.32    | 1<br>(0.8)          | 1 (0.8)      | 0.55                | 2<br>(1.6)   | 1 (0.8)                    | 0.29    | 2<br>(1.6)                  | 0<br>(0.0) |
| 40-65                               | 13<br>(10.4)     | 13<br>(10.4)       |             | 17<br>(13.6)                 |                  | 7<br>(5.6)                  |         | 3<br>(2.4)                  |         | 25<br>(20.0)        | 39<br>(31.2) |                     | 28<br>(22.4) | 36<br>(28.8)               |         | 63<br>(50.4)                | 1<br>(0.8) |
| >65                                 | 8<br>(6.4)       | 10<br>(8.0)        |             | 23<br>(18.4)                 |                  | 3<br>(2.4)                  |         | 7<br>(5.6)                  |         | 18<br>(14.4)        | 41<br>(32.8) |                     | 33<br>(26.4) | 25<br>(20.0)               |         | 56<br>(44.8)                | 2<br>(1.6) |
| <b>Sex</b>                          |                  |                    |             |                              |                  |                             |         |                             |         |                     |              |                     |              |                            |         |                             |            |
| Men                                 | 14<br>(11.2)     | 14<br>(11.2)       | 0.56        | 15<br>(12.0)                 | <b>0.02</b>      | 6<br>(4.8)                  | 0.93    | 6<br>(4.8)                  | 0.93    | 30<br>(24.0)        | 48<br>(38.4) | 0.32                | 37<br>(29.6) | 41<br>(32.8)               | 0.89    | 77<br>(61.6)                | 1<br>(0.8) |
| Women                               | 7<br>(5.6)       | 10<br>(8.0)        |             | 33<br>(26.4)                 |                  | 4<br>(3.2)                  |         | 4<br>(3.2)                  |         | 14<br>(11.2)        | 33<br>(26.4) |                     | 19<br>(15.2) | 20<br>(16.0)               |         | 44<br>(35.2)                | 3<br>(2.4) |
| <b>WBC, cells/<math>\mu</math>l</b> |                  |                    |             |                              |                  |                             |         |                             |         |                     |              |                     |              |                            |         |                             |            |
| <11000                              | 7<br>(5.6)       | 8<br>(6.4)         | 0.73        | 2<br>(1.6)                   | <b>0.004</b>     | 1<br>(0.8)                  | 0.18    | 1<br>(0.8)                  | 0.18    | 6<br>(5.1)          | 13<br>(11.0) | 0.46                | 10<br>(8.5)  | 9 (7.6)                    | 0.86    | 18<br>(15.3)                | 1<br>(0.8) |
| $\geq$ 11000                        | 12<br>(9.6)      | 17<br>(13.6)       |             | 36<br>(28.8)                 |                  | 9<br>(7.2)                  |         | 9<br>(7.2)                  |         | 29<br>(24.5)        | 42<br>(35.6) |                     | 39<br>(33.1) | 32<br>(27.1)               |         | 68<br>(57.6)                | 3<br>(2.5) |
| <b>PLT, cells/<math>\mu</math>l</b> |                  |                    |             |                              |                  |                             |         |                             |         |                     |              |                     |              |                            |         |                             |            |
| <150000                             | 9<br>(7.2)       | 7<br>(5.6)         | 0.51        | 38<br>(30.4)                 | <b>&lt;0.001</b> | 3<br>(2.4)                  | 0.98    | 3<br>(2.4)                  | 0.98    | 16<br>(12.8)        | 31<br>(24.8) | 0.51                | 24<br>(19.2) | 23<br>(18.4)               | 0.97    | 46<br>(36.8)                | 1<br>(0.8) |
| $\geq$ 150000                       | 12<br>(9.6)      | 16<br>(12.8)       |             | 10<br>(8.0)                  |                  | 7<br>(5.6)                  |         | 7<br>(5.6)                  |         | 28<br>(22.4)        | 42<br>(33.6) |                     | 36<br>(28.8) | 34<br>(27.2)               |         | 68<br>(54.4)                | 2<br>(1.6) |
| <b>Hemoglobin, g/dl</b>             |                  |                    |             |                              |                  |                             |         |                             |         |                     |              |                     |              |                            |         |                             |            |
| <13                                 | 11<br>(8.8)      | 20<br>(16.0)       | <b>0.03</b> | 14<br>(11.2)                 | <b>&lt;0.001</b> | 7<br>(5.6)                  | 0.25    | 8<br>(6.4)                  | 0.61    | 29<br>(23.2)        | 51<br>(40.8) | 0.66                | 38<br>(30.4) | 42<br>(33.6)               | 0.23    | 78<br>(62.4)                | 2<br>(1.6) |

|                  |        |        |      |        |      |       |      |       |      |        |         |      |        |         |      |        |       |      |        |       |
|------------------|--------|--------|------|--------|------|-------|------|-------|------|--------|---------|------|--------|---------|------|--------|-------|------|--------|-------|
| ≥13              | 8      | 3      |      | 34     |      | 3     |      | 2     |      | 15     | 22      |      | 22     | 15      |      | 36     | 1     |      | 37     | 0     |
|                  | (6.4)  | (2.4)  |      | (70.8) |      | (2.4) |      | (1.6) |      | (12.0) | (17.6)  |      | (17.6) | (12.0)  |      | (28.8) | (0.8) |      | (29.6) | (0.0) |
| <b>LDH, IU/l</b> |        |        |      |        |      |       |      |       |      |        |         |      |        |         |      |        |       |      |        |       |
| <480             | 17     | 19     |      | 34     |      | 9     |      | 9     |      | 36     | 59      | 0.89 | 51     | 44      | 0.28 | 92     | 3     | 0.39 | 94     | 1     |
|                  | (13.6) | (15.2) |      | (27.2) |      | (7.2) |      | (7.2) |      | (28.8) | (47.2)  |      | (40.8) | (35.2)  |      | (73.6) | (2.4) |      | (75.2) | (0.8) |
| ≥480             | 2      | 4      | 0.53 | 14     | 0.22 | 1     | 0.65 | 1     | 0.65 | 8      | 14      |      | 9      | 13      |      | 22     | 0     |      | 22     | 0     |
|                  | (1.6)  | (3.2)  |      | (11.2) |      | (0.8) |      | (0.8) |      | (6.4)  | (11.2)  |      | (7.2)  | (10.4)  |      | (17.6) | (0.0) |      | (17.6) | (0.0) |
| <b>LYMPH, %</b>  |        |        |      |        |      |       |      |       |      |        |         |      |        |         |      |        |       |      |        |       |
| <25              | 2      | 1      |      | 1      |      | 0     |      | 0     |      | 0      | 5 (4.0) | 0.48 | 3      | 2 (1.6) | 0.94 | 5      | 0     | 0.42 | 5      | 0     |
|                  | (1.6)  | (0.8)  |      | (0.8)  |      | (0.0) |      | (0.0) |      | (0.0)  |         |      | (2.4)  |         |      | (4.0)  | (0.0) |      | (4.0)  | (0.0) |
| 25-40*           | 3      | 0      |      | 0      |      | 0     |      | 0     |      | 3      | 3 (2.4) |      | 3      | 3 (2.5) |      | 5      | 1     |      | 5      | 1     |
|                  | (2.4)  | (0.0)  | 0.27 | (0.0)  | 0.59 | (0.0) | 0.50 | (0.0) | 0.50 | (2.4)  |         |      | (2.4)  |         |      | (4.0)  | (0.8) |      | (4.0)  | (0.8) |
| ≥40              | 14     | 22     |      | 47     |      | 10    |      | 10    |      | 35     | 61      |      | 51     | 45      |      | 94     | 2     |      | 96     | 0     |
|                  | (11.2) | (17.6) |      | (37.6) |      | (8.0) |      | (8.0) |      | (28.0) | (48.8)  |      | (40.8) | (36.0)  |      | (75.2) | (1.6) |      | (76.8) | (0.0) |

Data are presented as numbers (percentage); p values were obtained by the  $\chi^2$  test; \*Normal values of the laboratory.

**Supplementary Materials, Table S2.** Associations of genetic risk factors in CLL patients.

| No. of patients | Unmutated IGHV | IL-10 rs1800896 variant allele C | IL-10 rs1800872 variant allele T | TNF- $\alpha$ rs361525 variant allele A | TNF- $\alpha$ rs1800750 variant allele A | Chromosomal aberrations | Somatic mutations |
|-----------------|----------------|----------------------------------|----------------------------------|-----------------------------------------|------------------------------------------|-------------------------|-------------------|
| 24              | yes            | yes                              | no                               | no                                      | no                                       | yes                     | no                |
| 15              | yes            | yes                              | no                               | no                                      | no                                       | no                      | no                |
| 14              | yes            | no                               | yes                              | no                                      | no                                       | no                      | no                |
| 12              | yes            | yes                              | yes                              | no                                      | no                                       | no                      | no                |
| 11              | yes            | no                               | yes                              | no                                      | no                                       | yes                     | no                |
| 10              | yes            | yes                              | yes                              | no                                      | no                                       | yes                     | no                |
| 5               | yes            | no                               | no                               | no                                      | no                                       | no                      | no                |
| 5               | yes            | yes                              | yes                              | no                                      | no                                       | yes                     | yes               |
| 5               | yes            | no                               | no                               | no                                      | no                                       | yes                     | no                |
| 4               | yes            | yes                              | no                               | no                                      | no                                       | no                      | yes               |
| 3               | yes            | yes                              | yes                              | no                                      | no                                       | no                      | yes               |
| 3               | no             | yes                              | no                               | no                                      | no                                       | no                      | yes               |
| 2               | yes            | yes                              | no                               | no                                      | no                                       | yes                     | yes               |
| 2               | yes            | no                               | yes                              | no                                      | no                                       | no                      | yes               |
| 1               | no             | yes                              | yes                              | no                                      | no                                       | no                      | yes               |
| 1               | no             | no                               | no                               | no                                      | no                                       | no                      | yes               |
| 1               | no             | no                               | yes                              | no                                      | no                                       | yes                     | yes               |
| 1               | yes            | yes                              | no                               | yes                                     | no                                       | yes                     | yes               |
| 1               | yes            | no                               | yes                              | no                                      | no                                       | yes                     | yes               |
| 1               | yes            | no                               | no                               | no                                      | no                                       | yes                     | yes               |
| 1               | yes            | no                               | no                               | no                                      | no                                       | no                      | yes               |
| 1               | yes            | yes                              | yes                              | yes                                     | no                                       | no                      | no                |
| 1               | yes            | yes                              | no                               | yes                                     | no                                       | yes                     | no                |
| 1               | yes            | yes                              | no                               | yes                                     | yes                                      | no                      | no                |

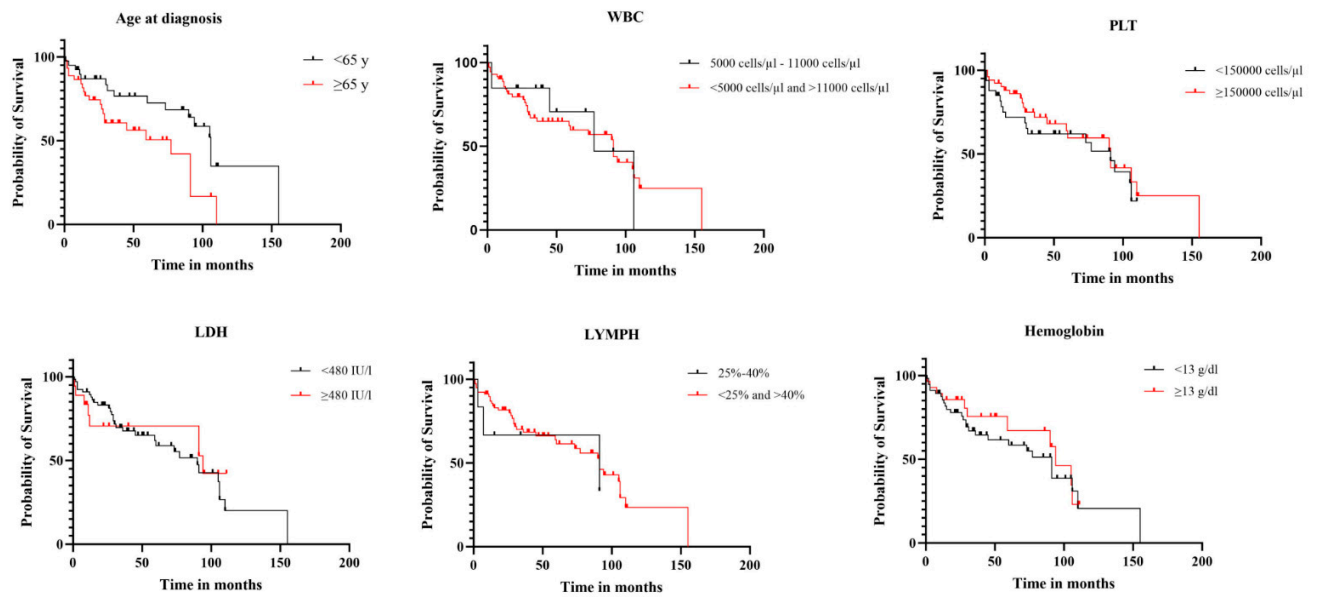

Supplementary Materials, Figure S1. Kaplan Meier curves for clinical characteristics of CLL patients
